# Supplementary material for: The Response of Cowpea (Vigna unguiculata) Plants to Three Abiotic Stresses Applied with Increasing Intensity: Hypoxia, Salinity, and Water Deficit
Source: MDPI journal article supplement (doi:10.3390/metabo12010038), 2022-01-04
Supplement: s1 [file s1]

**Table S1. *t* and *p* values of parameters using the Student's *t*-test: control vs treatment.**

| Parameter       |                           | Post-hypoxia   |                | Salinity       |                | Water deficit  |                |
|-----------------|---------------------------|----------------|----------------|----------------|----------------|----------------|----------------|
|                 |                           | <i>t</i> value | <i>p</i> value | <i>t</i> value | <i>p</i> value | <i>t</i> value | <i>p</i> value |
| Soil parameters | pH                        | -19.86         | 0.000          | -29.99         | 0.000          | -8.77          | 0.000          |
|                 | Conductivity              | 36.83          | 0.000          | -69.96         | 0.000          | -25.77         | 0.000          |
|                 | TDS                       | 26.59          | 0.000          | -69.70         | 0.000          | -10.66         | 0.000          |
| Morphology      | Shoot                     | 3.19           | 0.019          | 7.17           | 0.000          | 0.53           | 0.610          |
|                 | Root                      | 3.59           | 0.012          | 3.55           | 0.012          | -4.18          | 0.014          |
|                 | Number of compound leaves | -1.20          | 0.277          | 2.87           | 0.024          | 3.67           | 0.008          |
|                 | Leaf area                 | 0.11           | 0.913          | 0.26           | 0.801          | -0.13          | 0.904          |
| Fresh weight    | Shoot                     | 4.70           | 0.001          | 3.10           | 0.013          | 7.30           | 0.000          |
|                 | Roots                     | 0.85           | 0.422          | 0.43           | 0.679          | 0.33           | 0.751          |
|                 | Total                     | 4.27           | 0.003          | 2.79           | 0.031          | 4.93           | 0.001          |
| Dry weight      | Shoot                     | 7.46           | 0.000          | 3.07           | 0.013          | 1.90           | 0.089          |
|                 | Roots                     | 1.18           | 0.269          | -0.04          | 0.969          | -1.23          | 0.253          |
|                 | Total                     | 6.77           | 0.000          | 0.35           | 0.739          | -1.78          | 0.113          |
| Physiology      | Stomatal density          | -0.50          | 0.622          | -2.61          | 0.021          | -14.14         | 0.000          |
|                 | Stomatal index            | 1.22           | 0.235          | -1.69          | 0.108          | -2.80          | 0.012          |
|                 | RWC                       | 0.24           | 0.834          | 0.25           | 0.821          | 7.14           | 0.019          |
|                 | WUE                       | -11.28         | 0.001          | 14.12          | 0.001          | 21.59          | 0.000          |
| Pigments        | Chl <i>a</i>              | 0.69           | 0.540          | 0.50           | 0.650          | -5.74          | 0.011          |
|                 | Chl <i>b</i>              | 1.95           | 0.190          | 0.88           | 0.444          | -2.41          | 0.095          |
|                 | Total Chl                 | 2.13           | 0.100          | 0.85           | 0.459          | -3.04          | 0.038          |
|                 | Carotenoids               | 2.68           | 0.055          | -3.09          | 0.037          | -1.47          | 0.237          |
| Protein         | Leaves                    | -4.80          | 0.017          | -0.36          | 0.740          | -5.67          | 0.030          |
|                 | Roots                     | -8.97          | 0.003          | -0.13          | 0.904          | -1.16          | 0.329          |
| Sugars          | Leaves                    | 8.50           | 0.005          | 10.05          | 0.002          | 11.24          | 0.002          |
|                 | Roots                     | 10.77          | 0.002          | -3.33          | 0.045          | -5.63          | 0.030          |
| NO              | 3h                        | -1.03          | 0.378          | 7.11           | 0.019          | 4.47           | 0.021          |
|                 | 6h                        | 2.33           | 0.146          | 2.62           | 0.120          | 1.99           | 0.185          |
|                 | 9h                        | 3.11           | 0.036          | 2.43           | 0.136          | 2.26           | 0.153          |
| MDA             | Leaves                    | -12.45         | 0.001          | -4.98          | 0.016          | -2.61          | 0.080          |
|                 | Roots                     | -8.70          | 0.003          | -4.14          | 0.003          | -5.20          | 0.014          |
| Electrolyte     | Leaves                    | -9.74          | 0.000          | -7.12          | 0.001          | -10.15         | 0.000          |
| DPPH            | Leaves                    | 2.06           | 0.131          | -6.74          | 0.007          | -11.44         | 0.008          |
|                 | Roots                     | 1.13           | 0.341          | -3.75          | 0.020          | -3.57          | 0.038          |
| CAT             | Leaves                    | -1.52          | 0.226          | -2.61          | 0.121          | -7.81          | 0.016          |
|                 | Roots                     | -1.90          | 0.153          | -3.61          | 0.037          | -6.59          | 0.007          |
| POX             | Leaves                    | -0.75          | 0.507          | -4.88          | 0.039          | -3.38          | 0.043          |
|                 | Roots                     | -2.00          | 0.140          | -6.01          | 0.009          | -3.44          | 0.041          |
| PPO             | Leaves                    | -2.84          | 0.047          | -7.19          | 0.006          | -14.75         | 0.005          |
|                 | Roots                     | -1.83          | 0.164          | -5.84          | 0.010          | -5.20          | 0.035          |
| Phenolics       | Leaves                    | 2.71           | 0.114          | -1.54          | 0.263          | -4.61          | 0.044          |
|                 | Roots                     | -1.53          | 0.224          | -1.72          | 0.227          | -1.49          | 0.274          |
| Flavonoids      | Leaves                    | 5.28           | 0.013          | 0.86           | 0.453          | -3.40          | 0.042          |
|                 | Roots                     | -2.37          | 0.141          | -7.16          | 0.019          | -2.02          | 0.181          |
